# Supplementary material for: A Systems Approach Reveals Regulatory Circuitry for Arabidopsis Trichome Initiation by the GL3 and GL1 Selectors
Source: PLoS Genet. 2009 Feb 27;5(2):e1000396. doi: 10.1371/journal.pgen.1000396 (PMC2642726; doi:10.1371/journal.pgen.1000396)
Supplement: Table S4 — List of primers used in this study. (0.04 MB XLS) [file pgen.1000396.s013.xls]

## Sheet: Sheet1
Table S4. Primer list used in this manuscript
Primers for ChIP
At1g77670	At1g77670-A1	CTGGACGGGTTTTTGAGTAGAC
	At1g77670-B1	GCTTACCGAATTTTTCTTGTGG
At3g50790/At3g50800	At3g50790-A1	TCCGATTTCTGCTGTCCTTTAT
	At3g50790-B1	AACTCTCCAGAGATCGAACCAT
At4g20960	At4g20960-A1	ACAAATCCAATCTTCTCGTCGT
	At4g20960-B1	GAGGATTTGAGGAGAGTGATGG
At5g28350	At5g28350-A1	TCGGTTGACTTATGTTGACCAC
	At5g28350-B1	GAGCTCAGTCTCGCACTTAACA
At5g52510	At5g52510-A1	AAGAAAGGAAACAAAGGGCATC
	At5g52510-B1	GAGGATTCGTTGTTGAGACTCC
At3g10113	At3g10113-A1	GATATCGGATGAAGAGGTCGAG
	At3g10113-B1	CATCCTTTGTAATCCGTCCAAT
Act2/7	JP1595	CGTTTCGCTTTCCTTAGTGTTAGCT
	JP1596	AGCGAACGGATCTAGAGACTCACCTTG
TTG2	TTG2-A1	GCTCAAGGAACTCATACCAGAAA
	TTG2-B1	ATCACAACTTCAGTTTTTGCATTC
GL2	GL2-A1	GTAGCTGAAATTGGAAGGCTGATA
	GL2-B1	GCACCTTCAATTCTCCATTAATTT
FDH	KM_At2g26250_FDH-A1	AGTTCTCCACAAACCTGTCG
	KM_At2g26250_FDH-B1	CTGGTCGTAGTTGGAGTGAGTT
CPL3	KM_At4g01060_CPL3-A1	TGAAGTCACGGGTACTTGTGGT
	KM_At4g01060_CPL3-B1	AAGGTTGCACACGAACCATC
MYBL2	KM_At1g71030_MYBL2-A1	TGCGACACACTTCCACATTC
	KM_At1g71030_MYBL2-B1	AGAAGCGTGCATGCTCAATC
RBR1	KM_At3g12280_RBR-A1	CTTTCCCTCTCAGCGTTTCAC
	KM_At3g12280_RBR-B1	CTTCTCTCTCTAGAATGGGGTCTG
MYC1	KM_At4g00480_MYC1-A1	GATGTTGGCCAATCACCTAGTA
	KM_At4g00480_MYC1-B1	GACTTGGGTCATGATCTTGGTT
SIM	KM_At5g04470_SIM-A1	CTGACATGAAAAATAGGCACTATGA
	KM_At5g04470_SIM-B1	GCGATGATAGAAATAAATCCACAC
AN	KM_At1g01510_AN-A1	AGAGTTCCCATCTTGCTCCAGT
	KM_At1g01510_AN-B1	CGTCTTCCACTTGGCTTGTT
SPL8	KM_At1g02065_SPL8-A1	CCTTAACCACACGATCACCAC
	KM_At1g02065_SPL8-B1	AGCAACTGTTGATGGAGCCTCT
DIS1	KM_At1g13180_DIS1-A1	GTGGTTCAAGCGTCCTTATCAT
	KM_At1g13180_DIS1-B1	GAATTGAACCATACTGGGCTGA
CYCA2:3	KM_At1g15570_CYCA2:3-A1	CTCCCCCAATAAAAACACTTCC
	KM_At1g15570_CYCA2:3 -B1	GAAGGAGACACGCACACACTA
DIS1	KM_At1g30835_DIS1-A1	GCCAGGTATAATCAAAAGCCAGAG
	KM_At1g30835_DIS2-B1	GCCCATAGGCCCAATTATGTA
RHL1	KM_At1g48380_RHL1-A1	CATCCCTAAGAAGCAGAGGAAG
	KM_At1g48380_RHL1-B1	ATGAGAGTCTGGGGAGAGTCAG
RGA	KM_At2g01570_RGA-A1	CCATCAGATCTTGTAAATCAAAACA
	KM_At2g01570_RGA-B1	AGAAAAAGAATGGTGGTGATGG
BRK1	KM_At2g22640_BRK1-A1	AGTCCGGTTTACTGCTAATTGAAC
	KM_At2g22640_BRK1-B1	GTCAAGTGAATTATTCGGTATGCTC
ICK1	KM_At2g23430_ICK1-A1	CGCGTAATGGCAAATCTGTG
	KM_At2g23430_ICK1-B1	CGTGTTTTAGTGGTCCCGTTAC
CDC6	KM_At2g29860_CDC6-A1	GGTTTAAAACGGTAGCCGAAG
	KM_At2g29860_CDC6-B1	CGAGATCGATGTTGAGATTGAG
KIS	KM_At2g30410_KIS-A1	ACCTATGACAAAATTGCTCCGTTT
	KM_At2g30410_KIS-B1	CAAGTATACAATGATGGATGAATGG
CDT1	KM_At2g41270_CDT1-A1	CTGGTCTCTTTGGTTTGCATCT
	KM_At2g41270_CDT1-B1	GACGGAAGAAGAAGAAGGGTTTAG
NAP1	KM_At2g3510_NAP1-A1	CTCTCCTCTTTGTCGTCGTCAT
	KM_At2g3510_NAP1-B1	ACTCAACAACGAGTGACGAGTG
DIS3	KM_At2g38440_DIS3-A1	ACCTGTAGGCTGTAGTCGAAACTC
	KM_At2g38440_DIS3-B1	CCCTCGGGAACCTGATAGTT
PYM	KM_At2g42260_PYM-A1	ACGGTGAGGATTCGATCTTG
	KM_At2g42260_PYM-B1	CACGTGTCAAAGTGGTTTCACC
SPY	KM_At3g11540_SPY-A1	CTCCTAAATGGCTGGACATAATTC
	KM_At3g11540_SPY-B1	TTTCTTTCCACAGCTCAGATTG
Kinesin13A	KM_At3g16630_Kinnesin13A-A1	GATGGTCCAAAACAACATCC
	KM_At3g16630_Kinnesin13A-B1	GATCGTGACACAAGGACATATACC
HYP6	KM_At3g20780_HYP6-A1	CTTGCTATCTCCACAGCTCCTT
	KM_At3g20780_HYP6-B1	ATACTCGGAGCTGGGATCTTC
WURM	KM_At3g27000_WURM-A1	CCAACTTCGTACCAAAACCCTA
	KM_At3g27000_WURM-B1	ACTTGGTTGTGGGTATTGATGG
CDKA;1	KM_At4g48750_CDKA;1-A1	GTTACAGCAAACCGGACATACA
	KM_At4g48750_CDKA;1-B1	CCGGGTTTGATTGGTATTCA
GIS	KM_At3g58070_GIS-A1	AATGCCACCCATCCACTATG
	KM_At3g58070_GIS-B1	AGATGCTTAGACAGACGCAAGG
ARP7	KM_At3g60830_ARP7-A1	GATGGCCACACATGTTCTGA
	KM_At3g60830_ARP7-B1	CCCTAGCTCAAAGCTTTCTCTCTC
CYC3A	KM_At4g14880_CYC3A-A1	GGGAAGGAGAAGGAATTGGAG
	KM_At4g14880_CYC3A-B1	CGGTTTTTATGTCCCACCAC
SPK	KM_At4g16340_SPK1-A1	GGGATTCACCGATTCATAGATACC
	KM_At4g16340_SPK1-B1	GATGATACCTCACCTGAACCAACT
MYB98	KM_At4g18770_MYB98-A1	CCTCACTTTCATGTTGAGATATGAT
	KM_At4g18770_MYB98-B1	TTGTGTTAGCTTTGTTCTTTCTCG
CYCT;4	KM_At4g19600_CYCT;4-A1	GGATCTTGTACAGTGGAACCAG
	KM_At4g19600_CYCT;4-B1	GAGAATGAAGGGACCGAAGAAG
CYCD3;1	KM_At4g34160_CYCD3;1-A1	GCCGACAGATTTTACTGCAC
	KM_At4g34160_CYCD3;1-B1	TATGAGAGAAGGCCGAGAGATG
KAK	KM_At4g38600_KAKTUS-A1	ATTCATCAGTCGACGGACTCTC
	KM_At4g38600_KAKTUS-B1	GCCAGAGAAGAAGAACCTCTCA
TFCC	KM_At4g39920_TFCC-A1	GTTGTTGGTGATTGCAGGTT
	KM_At4g39920_TFCC-B1	GTCTGTGTAACCTTTCGACTTGC
RHL2	KM_At5g02820_RHL2-A1	GACACGTGTAATGGTGGGTAAG
	KM_At5g02820_RHL2-B1	GTCCGAGTGGTTAAGGAGATAGAC
CDKC;1	KM_At5g10270_CDKC:1-A1	ACTTGTGAGTGTGCTTGGCATT
	KM_At5g10270_CDKC:1-B1	GTTGGTGTAAATTAGCGATCATCC
KLK	KM_At5g18140_KLK-A1	GTTTAAGGCTCCGGTTAAACCTT
	KM_At5g18140_KLK-B1	CTATGAAGCAAACTTGATGACAGC
FASS	KM_At5g18580_FASS-A1	CCCTAGGAGGAAGACGTGTATAAG
	KM_At5g18580_FASS-B1	CTTCACTCCTCAAGCTCTAGCC
XIK	KM_At520490_XIK-A1	CGTCTTCCCATTAACACGAGAG
	KM_At520490_XIK-B1	GTGAGAGCCGCTAAGTGAAATG
E2Fa	KM_At5g22220_E2Fa-A1	TCCCCTCAATCTCAAGGAAA
	KM_At5g22220_E2Fa-B1	GGGAATTAGCGCTCTTTATCTCTC
YRE	KM_At5g57800_YRE-A1	CCAAATTAAAAGCTCGAACG
	KM_At5g57800_YRE-B1	CAATCTGCTGAGGAATGTTTTG
FAS2	KM_At5g64630_FAS2-A1	GTCGACTGCTATGCGAATCA
	KM_At5g64630_FAS2-B1	CCGACTAGTCCGGTTTATTCTA
CPR5	KM_At5g64930_CPR5-A1	GACACCTCATCGTGTTATTTATCG
	KM_At5g64930_CPR5-B1	GTTCAATGAATAGGATCGGTTCAG
CDKC;2	KM_At5g64960_CDKC;2-A1	GGCATTGTTGAGATGACTGAGG
	KM_At5g64960_CDKC;2-B1	ACACAGTTACGGATGAGCGAAG
ZWI	KM_At5g65930_ZWI-A1	AGCAGTACTTCGAGAGAGTGGAAC
	KM_At5g65930_ZWI-B1	CTCTGCTGCTTTGGTGTCAA
rndmGL1 #1	KM_rndmGL1#1_A1	GTGAGCGGCGACCTTTTAAT
	KM_rndmGL1#1_B1	TCTGGTTCTGGCTCGTTTCT
rndmGL1 #4	KM_rndmGL1#4_A1	AGGTCACTAAGTCAAGCCAAGC
	KM_rndmGL1#4_B1	GACTGTGCAGTCGAGTATCTGTG
rndmGL1 #5	KM_rndmGL1#5_A1	GCACAGTTCTCTGGAAATCTCA
	KM_rndmGL1#5_B1	TAGACTCTGGACCAGCCCATTAT
rndmGL1 #6	KM_rndmGL1#6_A1	AGTTCCGGAGTCTGGTAGCAAT
	KM_rndmGL1#6_B1	CTTCTGCAATCTTGGCTTCC
rndmGL1 #9	KM_rndmGL1#9_A1	GTCTGGCTCTTTCACCTCTTTG
	KM_rndmGL1#9_B1	AGACTGCAAGGCCATATGCT
rndmGL1 #10	KM_rndmGL1#10_A1	CTCTGCACTCACGGAACAAAC
	KM_rndmGL1#10_B1	GGGACGGAGGATTATTGAGTTG
rndmGL1 #11	KM_rndmGL1#11_A1	ATTTACTCATCATCCGGGTCAC
	KM_rndmGL1#11_B1	GTTATCCTCAATCTCGCGTGTA
rndmGL1 #13	KM_rndmGL1#13_A1	CTCGACCTCATACTCGACCA
	KM_rndmGL1#13_B1	GGTGTGTTCTAGCAGTCCTAAGTG
rndmGL1 #14	KM_rndmGL1#14_A1	GGGAGAGCACTAACCATGATGT
	KM_rndmGL1#14_B1	AGCCAGAAACCAAAGCGAAG
rndmGL1 #15	KM_rndmGL1#15_A1	GTAATCTTCGCCTACTCGGTTG
	KM_rndmGL1#15_B1	GGTCGATCTCCCAACAAAAG
rndmGL1 #16	KM_rndmGL1#16_A1	AGGGGGTGAATACAAGGGTTC
	KM_rndmGL1#16_B1	CCTGGTAACAGTAAGGGTGTCA
rndmGL1 #17	KM_rndmGL1#17_A1	CAAACAGAAGAGGCATGGAGAC
	KM_rndmGL1#17_B1	CTCCTCTTGATCTACCACACTCG
rndmGL1 #18	KM_rndmGL1#18_A1	GAGACCCCAATTCTTGAGAAGG
	KM_rndmGL1#18_B1	GACTAACCGGAAACCGTAACAG
rndmGL1 #19	KM_rndmGL1#19_A1	GTCTCGTGTCCTCCTCTTTCTCT
	KM_rndmGL1#19_B1	ATTCCTCGGACCTTTCCATC
rndmGL1 #20	KM_rndmGL1#20_A1	GTGGTAGAGTGAATGGTCGAGTG
	KM_rndmGL1#20_B1	GAGCCAGAACCAGAAGACATACTC
rndmGL3 #1	KM_rndmGL3#1_A1	GAGGGGATCCACCTAACATGA
	KM_rndmGL3#1_B1	GTCAAGTGCATGGGAGTCATAG
rndmGL3 #2	KM_rndmGL3#2_A1	ATCAACGTGGTGTTAGCTAGTGG
	KM_rndmGL3#2_B1	TGCAAATGGAGAAGATTAGCTG
rndmGL3 #3	KM_rndmGL3#3_A1	GAACCAATAACAGAAGCAAGCA
	KM_rndmGL3#3_B1	GTTGCAAATGATAAGTCCACTGAG
rndmGL3 #4	KM_rndmGL3#4_A1	CCATGGTTGTTCTTTGCTCTG
	KM_rndmGL3#4_B1	CCATGATTCATAGGCCCAAA
rndmGL3 #5	KM_rndmGL3#5_A1	AGCTTCACCTCTCCCTCTCTTC
	KM_rndmGL3#5_B1	CTTGAGATAGTCGGAGTCAGGTC
rndmGL3 #6	KM_rndmGL3#6_A1	CTCTATCCTCTGCCTTGAAACC
	KM_rndmGL3#6_B1	CAGTGGCTCAGGTCAATCTTCT
rndmGL3 #7	KM_rndmGL3#7_A1	ACGTCATCTAGTATCTTGGCAGCA
	KM_rndmGL3#7_B1	AGAGCGCCGAGCATAAGTATAG
rndmGL3 #8	KM_rndmGL3#8_A1	GATGGTAGAGAGTTTGTGGATGTC
	KM_rndmGL3#8_B1	ATTGAACCTTTTCCGCAACG
rndmGL3 #9	KM_rndmGL3#9_A1	GGATCAAGCCACACGTAGTTC
	KM_rndmGL3#9_B1	GTACCTCGTTTGCCCATCTATC
rndmGL3 #10	KM_rndmGL3#10_A1	AGGTCAAGAGGCTCAATAGTCG
	KM_rndmGL3#10_B1	GGTCCTCTTGCTCCTTGAGATA
rndmGL3 #11	KM_rndmGL3#11_A1	GCGGATCTCAAGATATGCTTTT
	KM_rndmGL3#11_B1	GTGCCATCGAGTAAACAAACAA
rndmGL3 #12	KM_rndmGL3#12_A1	CCACACCTGTGAGAACCAAAG
	KM_rndmGL3#12_B1	AGGAAGAGGAAGGGGTAGAGG
rndmGL3 #13	KM_rndmGL3#13_A1	CTCTAGCCAGTTCGCGTAATAGAG
	KM_rndmGL3#13_B1	CTCAAGTCGCCTCTAGGAAAAG
rndmGL3 #14	KM_rndmGL3#14_A1	CCTCTCTCTCACTTTGGTATAGGC
	KM_rndmGL3#14_B1	CTTGAGGGTTACACGCGTTCT
rndmGL3 #15	KM_rndmGL3#15_A1	GAAGACCCCCACATACAAGATG
	KM_rndmGL3#15_B1	GGCCTTCTCATGTTGTCCTCTA
rndmGL3 #16	KM_rndmGL3#16_A1	CCTGCTCGTATGTAGACCAATCC
	KM_rndmGL3#16_B1	TAGCACCATGCTCTGTCTCTACC
rndmGL3 #17	KM_rndmGL3#17_A1	GTTAATGGAGTGAGGGAGGGAAG
	KM_rndmGL3#17_B1	GCTTAACCGGGAAAAGGTACTG
rndmGL3 #18	KM_rndmGL3#18_A1	ATCGCGTCTTGTGAATCTCC
	KM_rndmGL3#18_B1	TCTCCTCCTCCTAATAGCTCTCG
rndmGL3 #19	KM_rndmGL3#19_A1	CCTCCTCTACTCTCACCATCTCC
	KM_rndmGL3#19_B1	GGAGTTAGGGATAAGGGATTCG
rndmGL3 #20	KM_rndmGL3#20_A1	CATCACTTTTACCCCCACCA
	KM_rndmGL3#20_B1	CCGAGGTGGATATGGAGGTAG
Primers for real-time RT-PCR
CPC	CPC-qRTPCRf	TTGGCGACAGGTGGGAGTTGAT
	CPC-R1	AACGACGCCGTGTTTCATAAG
At1g77670	qrt At1g77670-F	AGCCTCTCTTCTCCCATTCTCT
	qrt At1g77670-R	CTCGTTCTGAGTCGAAACTGTG
At3g50790	qrt At3g50790-F	AGAAATGTCTCGTCCCTCTCAC
	qrt At3g50790-R	GTACGGTTTAGCGAGTGAGTCC
At3g50800	qrt_At3g50800-F	GGAGGAGGTTTGAGTTACAACG
	qrt_At3g50800-R	AGTCACGAGTCAACTCAACGAG
At4g20960	qrt At4g20960-F	CTCGCCCTCAGGTATTCTATGT
	qrt At4g20960-R	AGTATCCACCACTATCCGAAGC
At5g52510	qrt At5g52510-F	ATCGAGGATAGCTTCTCCAGTG
	qrt At5g52510-R	AAGGAGAGAGCTCGTAGAGCAA
At5g28350	qrt At5g28350-F	TCGGATGGGCAGCTAGTAGTAT
	qrt At5g28350-R	CACCAACCTTCTTCTCAGCTCT
FDH	qPCR-FDH-F	TCAGGAGTGTGTACCAGGAAGA
	qPCR-FDH-R	CTTGAGAGCTTCACCTCCAACT
SIAMESE	qPCR-SIM-F	ACAAGATTCCTCCCACCACAG
	qPCR-SIM-R	CAAGATCTGATGCCGAGAGAC
CPL3	qPCR-CPL3-F	GATAACCATCGCAGGACTAAGC
	qPCR-CPL3-R	CCCACTCAAGACTACTCACTTCTG
RBR1	qPCR-RBR1-F	AAGAAGTTCAGCCTCCAGTGAC
	qPCR-RBR1-R	CTCGCATATGTCCAAGAGAGAG
MYC1	qPCR-MYC1-F	ACTATGGTTCCCACTGTCAACG
	qPCR-MYC1-R	AGCTCTTCTACTCTTGCCTCCA
GL2	GL2-F	ATGAAGCTCGTCGGCATGAGTGGG
	GL2-qRTPCRr	TGGATTGCCACTGAGTTGCCTCTG
TTG2	TTG2-BB	TGCTTAGGAAGTTGTGAGTGAAG
	TTG2en-qRTPCRf	CCCCACAACTTTCTAAGCAAACA
